# Supplementary material for: Heterogenic Final Cell Cycle by Chicken Retinal Lim1 Horizontal Progenitor Cells Leads to Heteroploid Cells with a Remaining Replicated Genome
Source: PLOS journal article supplement (doi:10.1371/journal.pone.0059133), 2013-03-19
Supplement: S2 (10.1371/journal.pone.0059133.s002) [file journal.pone.0059133.s002]

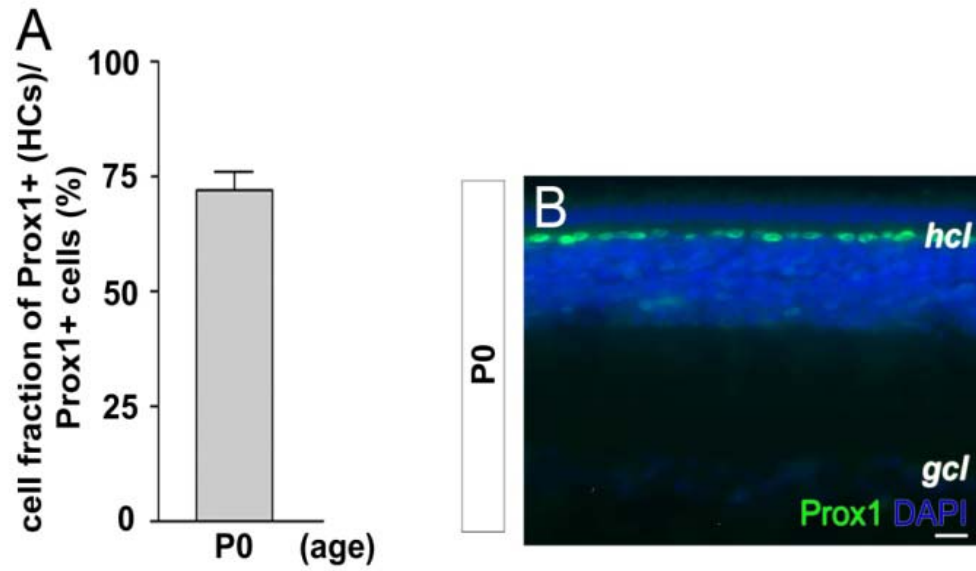

Supplemental figure S2. Fraction of Prox1+ cells that are HCs

(A) Bargraph with the fraction of Prox1+ cells located in the HC layer compare with the total number of Prox1+ cells at P0. (B) Fluorescence micrographs with Prox1 on P0 retina.gcl; ganglion cell layer, hcl; horizontal cell layer, P0 = post hatched. Scale bar is 10μm.
